# Supplementary material for: Cloning and Organelle Expression of Bamboo Mitochondrial Complex I Subunits Nad1, Nad2, Nad4, and Nad5 in the Yeast Saccharomyces cerevisiae
Source: MDPI journal article supplement (doi:10.3390/ijms23074054), 2022-04-06
Supplement: s1 [file s1]

## Supplementary Materials

Tsai et al. 2022

| Table S1. The primers used for PCR of mitochondrial NADH:ubiquinone oxidoreductase subunits <i>nad1</i> , <i>nad2</i> , <i>nad4</i> , and <i>nad5</i> |                                              |                                                                                   |
|-------------------------------------------------------------------------------------------------------------------------------------------------------|----------------------------------------------|-----------------------------------------------------------------------------------|
|                                                                                                                                                       | Forward primer (5' to 3')                    | Reverse primer (5' to 3')                                                         |
| <i>nad1a</i>                                                                                                                                          | ACGTACATAGCTGTTCCAGC                         | ATATTC <sup>T</sup> / <sub>c</sub> ACATTATAGCC <sup>T</sup> / <sub>A</sub> GCAACT |
| <i>nad1b</i>                                                                                                                                          | GGAGCATTACGATCTGCAGCTCAA                     | ATTCAGCTTCCGCTTCTGGGAG                                                            |
| <i>nad1c</i>                                                                                                                                          | ATCTCCAGAAGCGGAAGC                           | ACGGGGA <sup>c</sup> / <sub>G</sub> TA <sup>c</sup> / <sub>G</sub> CCGAGCTA       |
| <i>nad1d</i>                                                                                                                                          | ATGGTCCGGTATTCCTTGT                          | TAAGGGAGCCATCGAAAGG                                                               |
| <i>nad1-F,R</i>                                                                                                                                       | ACGTACATAGCTGTTCCAGCG                        | TTAAGGGAGCCATCGAAAGG                                                              |
| <i>nad1F-BamHI(BH)</i>                                                                                                                                | ATATggatccACGTACATAGCTGTTCCAGC<br>GGAAAT     | —                                                                                 |
| <i>nad1R-EcoRIII(E3)</i>                                                                                                                              | —                                            | GAGAgaattcTTAAGGGAGCCATCGAAAGG<br>TGACTA                                          |
| <i>nad2-F,R</i>                                                                                                                                       | ACTGA <u>AAGCTT</u> ATGTTCAATCTTTTTTTA<br>GC | CTAGA <u>AAGCTT</u> CCAGATATGAACTGAGTG<br>CC                                      |
| <i>nad2-BamHI-F,R</i>                                                                                                                                 | ATGGATCCAGATGTTCAATCTTTTTTTA<br>GCGG         | ATATATGGATCCGAGAAGCTTCCAGAT<br>GAAC                                               |
| <i>nad4a</i>                                                                                                                                          | ATGTTAGAACATTTCTGTGAATGC                     | AGCCGTAGGTGCCTCTACAT                                                              |
| <i>nad4b</i>                                                                                                                                          | GCCAAATCCTTCTATGGATTGC                       | TGGTAGAGAAATTCGGCATGGT                                                            |
| <i>nad4c</i>                                                                                                                                          | GTAGCCCATATGAATTTGGTGAC                      | TTTGCCATGTTGCACTAAGTTAC                                                           |
| <i>nad4-F,R</i>                                                                                                                                       | ATGTTAGAACATTTCAAGTGAATGCTATTT<br>CGATC      | TCAATGAAATTTGCCATGTTGCACTAAG<br>TTA                                               |
| <i>nad5a</i>                                                                                                                                          | AGAACGATCTAAAGAGGGTCATAG                     | TTGGCCAAGTATCCTACAAAG                                                             |
| <i>nad5b</i>                                                                                                                                          | TGCCTTTGCTCGGTAGTT                           | ATGGTGGAAGTCTACTGTTTG                                                             |
| <i>nad5c</i>                                                                                                                                          | AGCTATAAAAGCTATGCTTGTCAT                     | CCGAATAGTTAGAGATGCCG                                                              |
| <i>nad5d</i>                                                                                                                                          | TTTGACCTATGCCATGATGCT                        | GAATATCCGAAACGCAGGAA                                                              |
| <i>nad5e</i>                                                                                                                                          | CCTTTAATACTTTTGGCTCT                         | TTACTCTTGACTTGACTTATTAAT                                                          |
| <i>nad5-F,R</i>                                                                                                                                       | ATGTATCTACTTATTGTCTTTTGCCTTT                 | TTATTCTTGACTTGACTTATTAATAATAA<br>AACTAC                                           |
| <i>nad5-EcoRI-F</i>                                                                                                                                   | ACTGGAATTCATGTATCTACTTATTGTC<br>TTTTTGC      | GCTCACCATCCCGGGATATTCTTGACTT<br>GACTTAT                                           |
| <i>nad5-XmaI-R</i>                                                                                                                                    | —                                            | GCTCACCATCCCGGGATATTCTTGACTT                                                      |

|                  |                                          |                                          |
|------------------|------------------------------------------|------------------------------------------|
|                  |                                          | GACTTAT                                  |
| pYES2-F448       | AACCCCGGATCGGACTACTA                     | —                                        |
| pYES2-R857       | —                                        | CGCAAATTAAAGCCTTCGAG                     |
| pEGFP-F10        | CTAGCGCTACCGGACTCAGAT                    | —                                        |
| pEGFP-R909       | —                                        | TCAGGTTCAGGGGGAGGT                       |
| mt-egfp-F,R      | AAGCTTATGTTACGTTC                        | GAAC TTCAGGGTCAGCTTGC                    |
| M13-F,R          | GTTTTCCCAGTCACGAC                        | TCACACAGGAAACAGCTATGAC                   |
| A105T-F,R        | CATCACAAGCTTTATGTGGGGATCCAG<br>ATG       | CATCTGGATCCCCACATAAAGCTTGTG<br>ATG       |
| pT-nad1F-BH      | ATATGGATCCGATGTACATAGCTGTTCCAGC          | —                                        |
| pT-nad1R-E1      | —                                        | TATAGAATTCGGCCAAGGGAGCCATCGAA            |
| pY-nad1F-H3      | ATATAAGCTTATGTACATAGCTGTTCCAGC           | —                                        |
| pY-nad1R-E1      | —                                        | ATATGAATTCGG AAGGGAGCCATCGAA             |
| nad1-top-A695C   | CTCTTTTTTTTTTTGGGAGcGTATGCCAA<br>TATGATC | —                                        |
| nad1-bottom-A695 | —                                        | GATCATATTGGCATACgCTCCCCAAAAAAA<br>AAAGAG |
| nad4F,R-EZ       | CACAAGCTTGGTACCATGTTAGAACATTT<br>CTGTG   | CGGGCCCGCGGTACCCAATGAAATTTGC<br>CATG     |
| BamHI-nad2-F,R   | ATGGATCCAGATGTTCAATCTTTTTTTA<br>GCGG     | ATATATGGATCCGAGAAGCTTCCAGAT<br>GAAC      |
| EcoRI-nad5-F     | ACTGGAATTCATGTATCTACTTATTGTCT<br>TTTTGC  | —                                        |
| XmaI-nad5-R      | —                                        | GCTCACCATCCCGGGATATTCTTGACTT<br>GACTTAT  |

The underlined sequences indicated the restriction enzyme cutting site. F: forward primer, R: reverse primer. BH: *Bam* HI, E1: *Eco* RI, and H3: *Hind* III. The sequences in lower case indicated the mutated nucleotides

**Table S2. SC-U media**

(A)

| SC-U medium                             |                     |
|-----------------------------------------|---------------------|
| Chemical                                | Final concentration |
| yeast nitrogen base without amino acids | 0.67% (w/v)         |
| dropout mix without uracil              | 0.2 % (w/v)         |
| glucose                                 | 2% (w/v)            |

(B)

| SC-U medium for induction               |                     |
|-----------------------------------------|---------------------|
| Chemical                                | Final concentration |
| yeast nitrogen base without amino acids | 0.67% (w/v)         |
| dropout mix without uracil              | 0.2 % (w/v)         |
| galactose                               | 2% (w/v)            |

**Table S3. Comparison of succinate oxidation in isolated yeast mitochondria from the yeast transformants.**

| Yeast transformants                                                 | -ADP<br>(state 2) | +ADP<br>(sate 3) | RC ratio<br>sate 3/state 2 |
|---------------------------------------------------------------------|-------------------|------------------|----------------------------|
| <i>nmole O<sub>2</sub> min<sup>-1</sup> mg<sup>-1</sup> protein</i> |                   |                  |                            |
| Y                                                                   | 138.88 ± 18.35    | 342.46 ± 0       | 2.47                       |
| MG                                                                  | 85.42 ± 8.80      | 184.13 ± 25.20   | 2.16                       |
| MN1G                                                                | 51.03 ± 11.59     | 174.91 ± 11.21   | 3.43                       |
| MN4G                                                                | 59.76 ± 11.21     | 163.04 ± 41.79   | 2.73                       |

Note: Data were the mean ± SD of four measurements. Y: yeast-pYES2 transformant; MG: pYES2-mt-egfp transformant; MN1G: yeast-pYES2-mt-nad1-egfp transformant; MN4G: yeast-pYES2-mt-nad4-egfp transformant.

Figure 1 displays a multiple sequence alignment of the 5' region of the 18S rDNA gene. The alignment includes sequences for *B. o. nad1* (cdNA), *P. e. nad1* (cdNA), *B. o. nad1*, *O. s. nad1*, *T. a. nad1*, and *Z. m. nad1*. The alignment is presented in blocks of 100 positions, with position numbers (10, 20, 30, 40, 50, 60, 70, 80, 90, 100) indicated at the top of each block. Conserved regions are highlighted with red boxes, and gaps are indicated by dashes. The alignment shows high conservation across the sequences, particularly in the regions highlighted by the red boxes.

Figure S1B

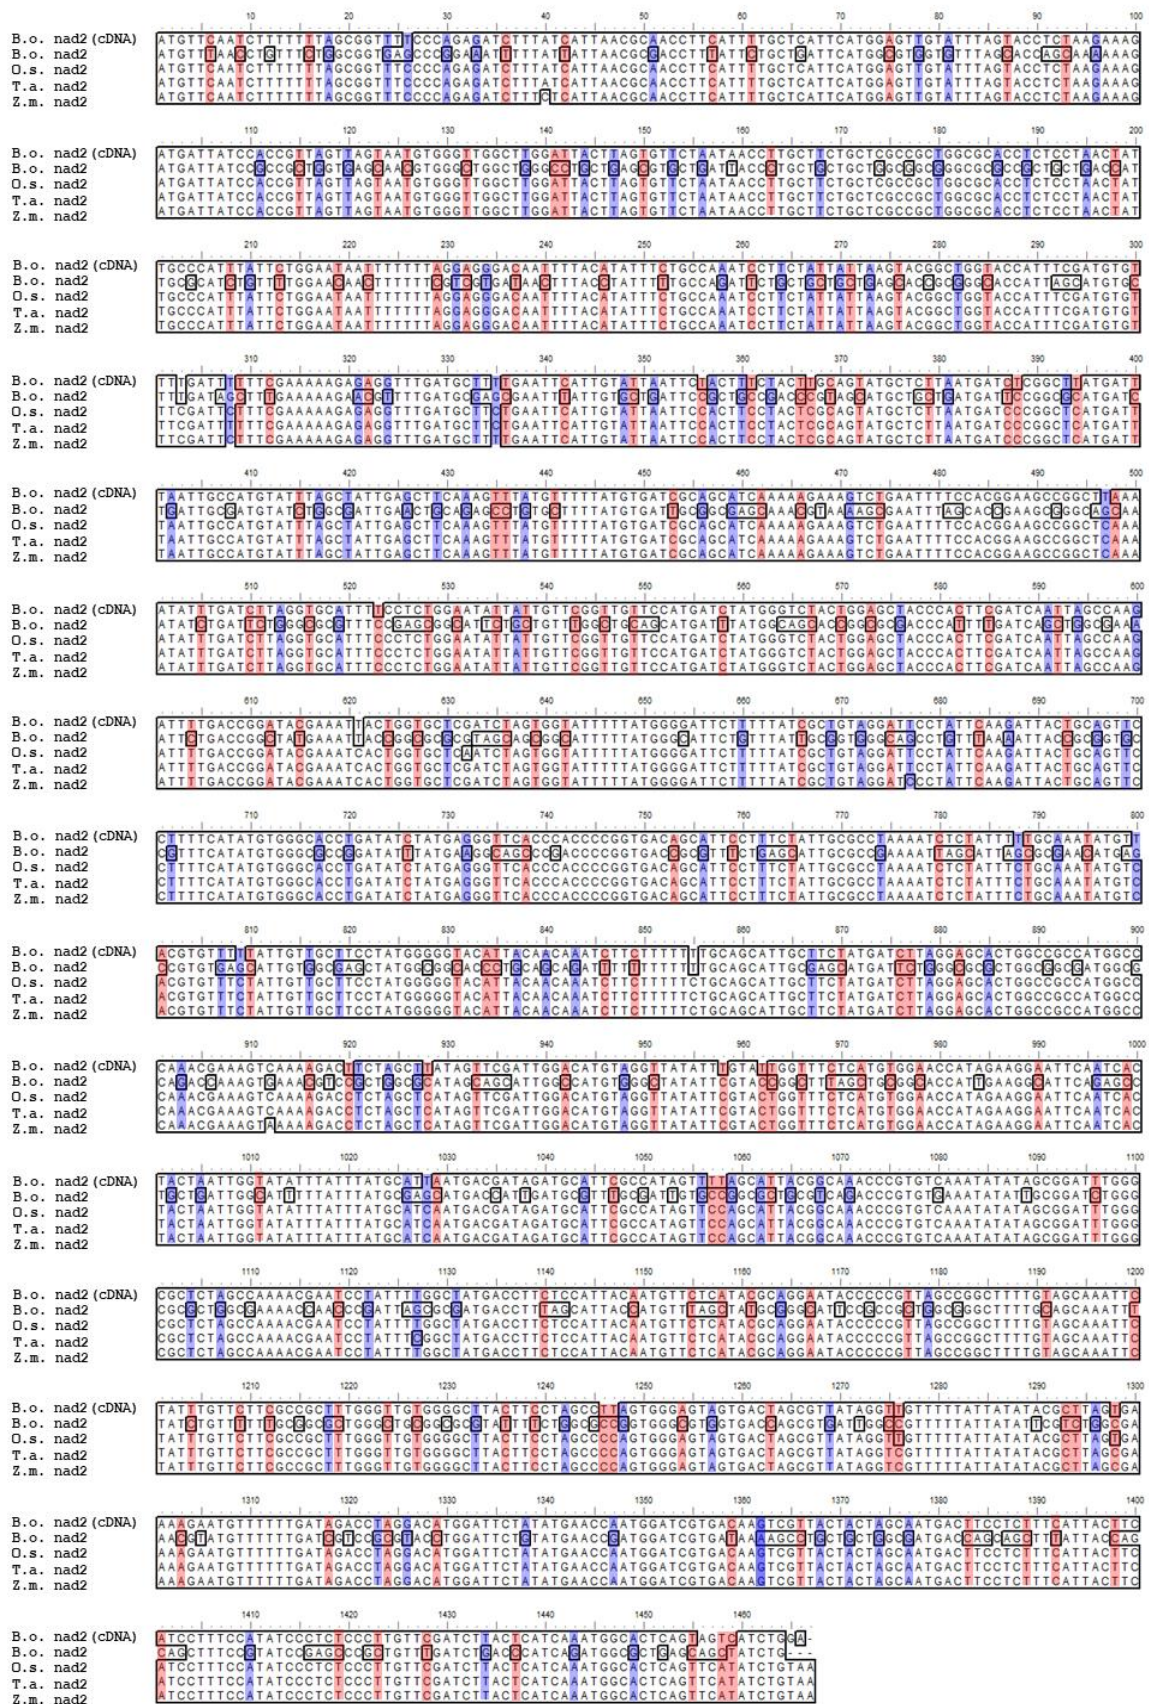

Figure S1C

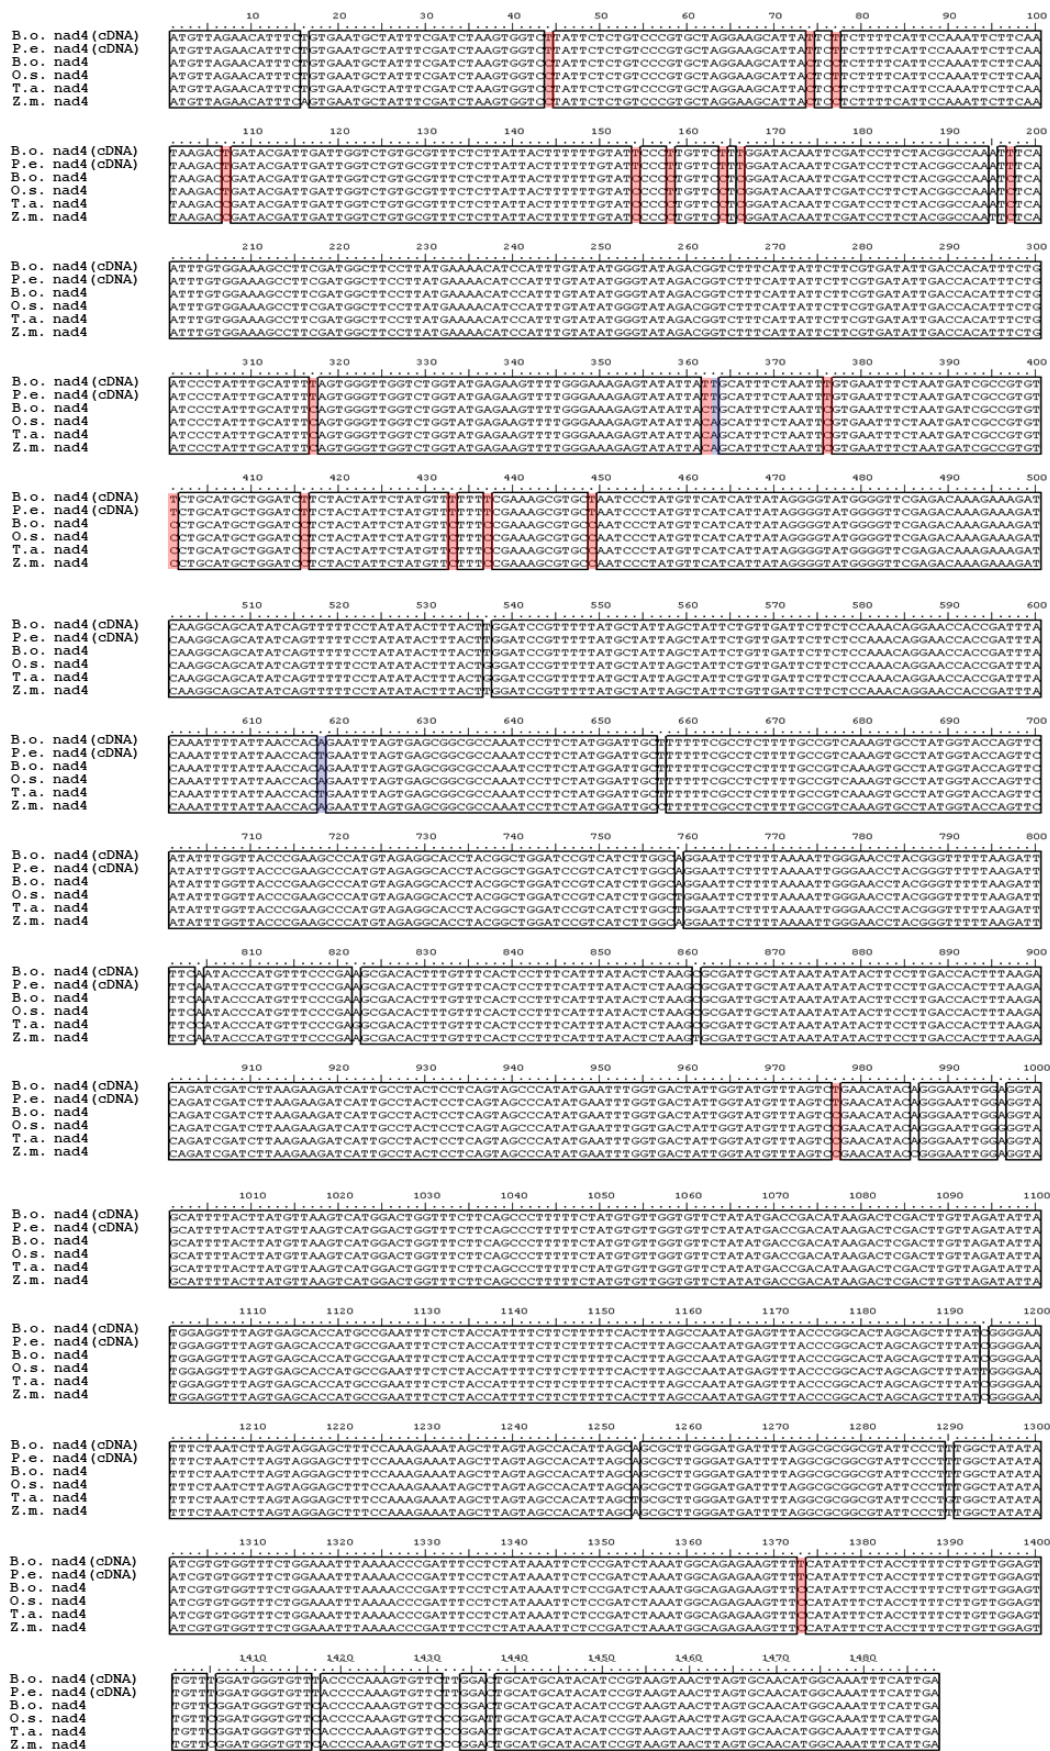

Figure S1D

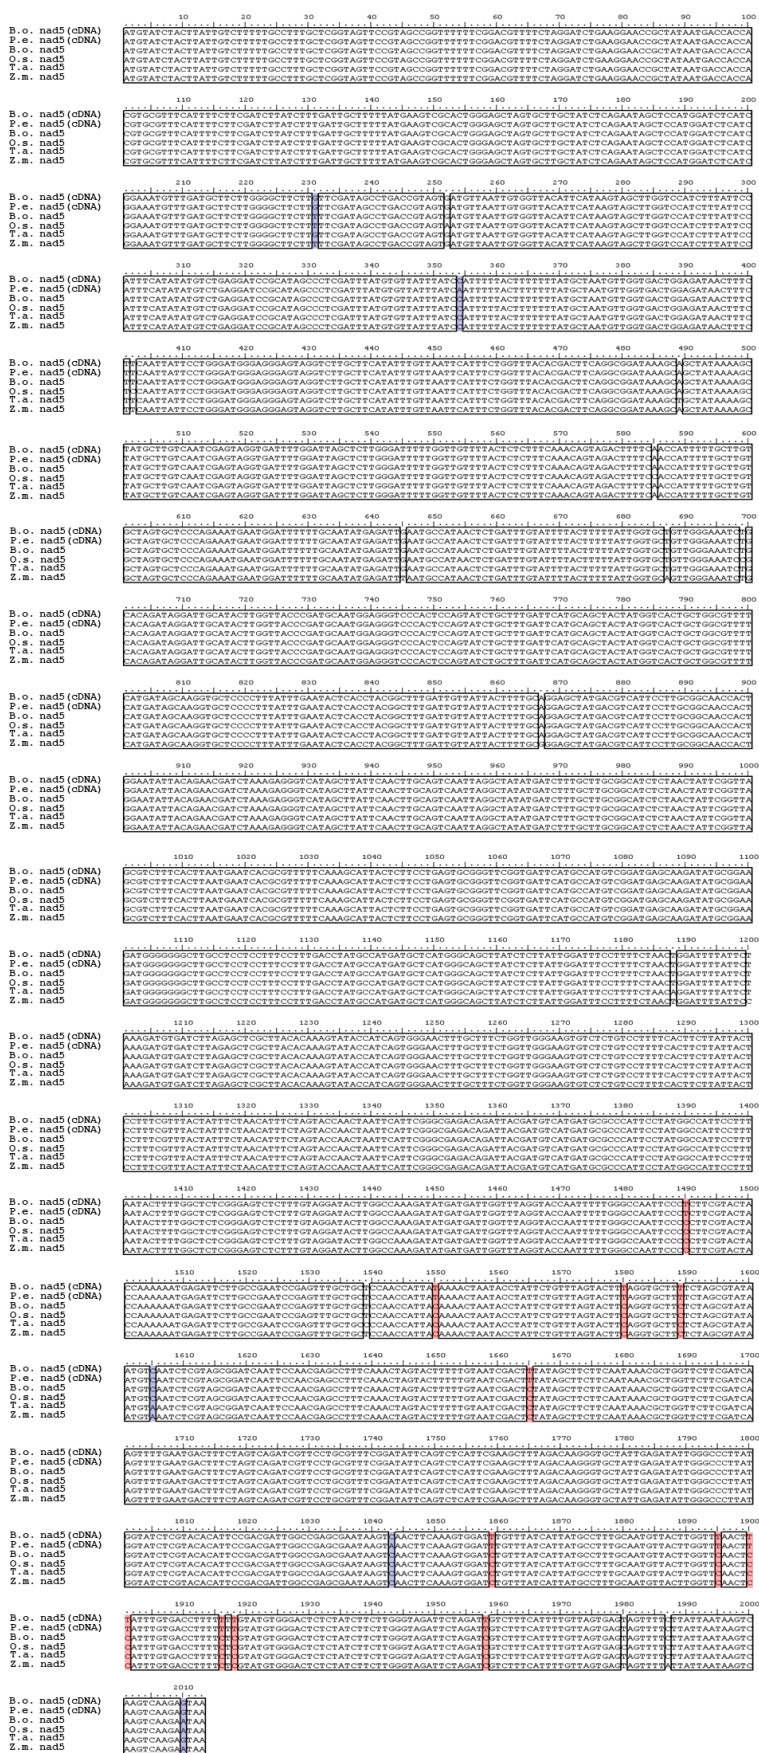

**Figure S1 Comparison of bamboo mitochondrial *nad1*, *nad2*, *nad4* and *nad5* cDNA sequences with other species.** The cDNA sequences of (A) *nad1*, (B) *nad2*, (C) *nad4*, and (D) *nad5* of *B. oldhamii* (B.o.) and *P. eduli* (P.e.) are compared with those of their homologues from monocotyledon *Oryza sativa* (O.S., DQ167399), *Triticum aestivum* (T.A., AP008982) and *Zea mays* (Z.M., AY506529) using the software BioEdit. The accession numbers of *nad1*, *nad2*, *nad4* and *nad5* were obtained from NCBI database. The sequences of mitochondrial genomic DNA (mtDNA) of *B. oldhamii* from Lin *et al.* [20] were also applied. The nucleotides which may proceed in C-to-U RNA editing were marked in red.

**Figure S2**

**(A) NAD1.Bo (1)**

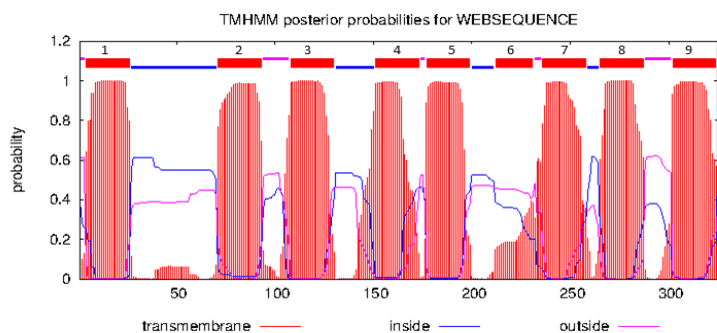

**(B) NAD2.Bo (1)**

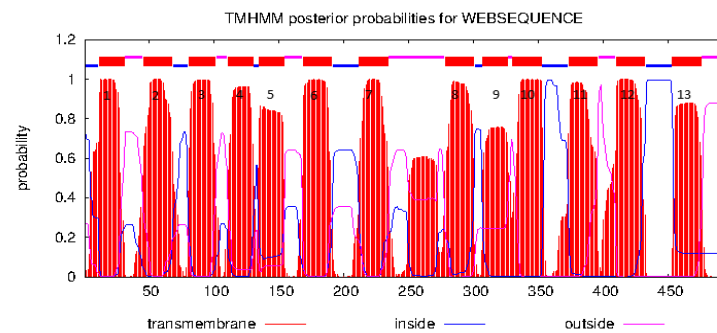

**(C) NAD4.Bo (1)**

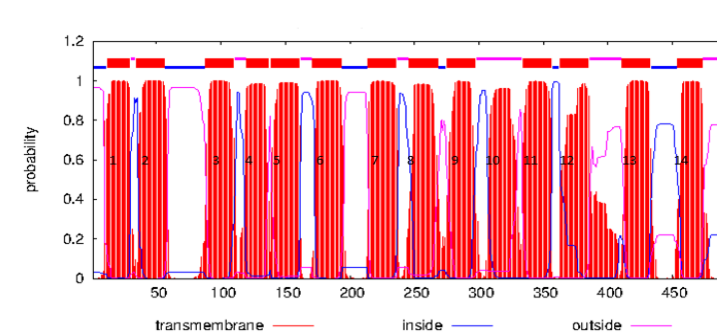

**(D) Nad5-Bo (1)**

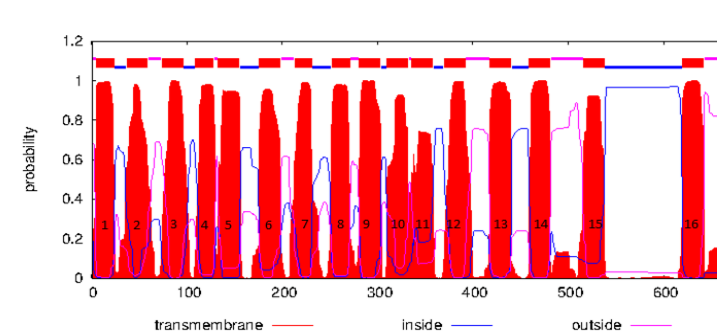

**Figure S2 Prediction of the transmembrane helices of Nad1, Nad2, Nad4, and Nad5 subunits by TMHMM program.** The transmembrane domain numbers of Nad1, Nad2, Nad4 and Nad5 subunits were based on the program TMHMM. (A) NAD1 subunit has 9 transmembrane helices, (B) NAD2 subunit has 13 (or 14) transmembrane helices, (C) NAD4 subunit has 14 transmembrane helices, and (D) NAD5 subunit has 16 transmembrane helices. Red line indicated transmembrane helices; blue and pink lines were inside and outside loops, respectively.

Figure S3A

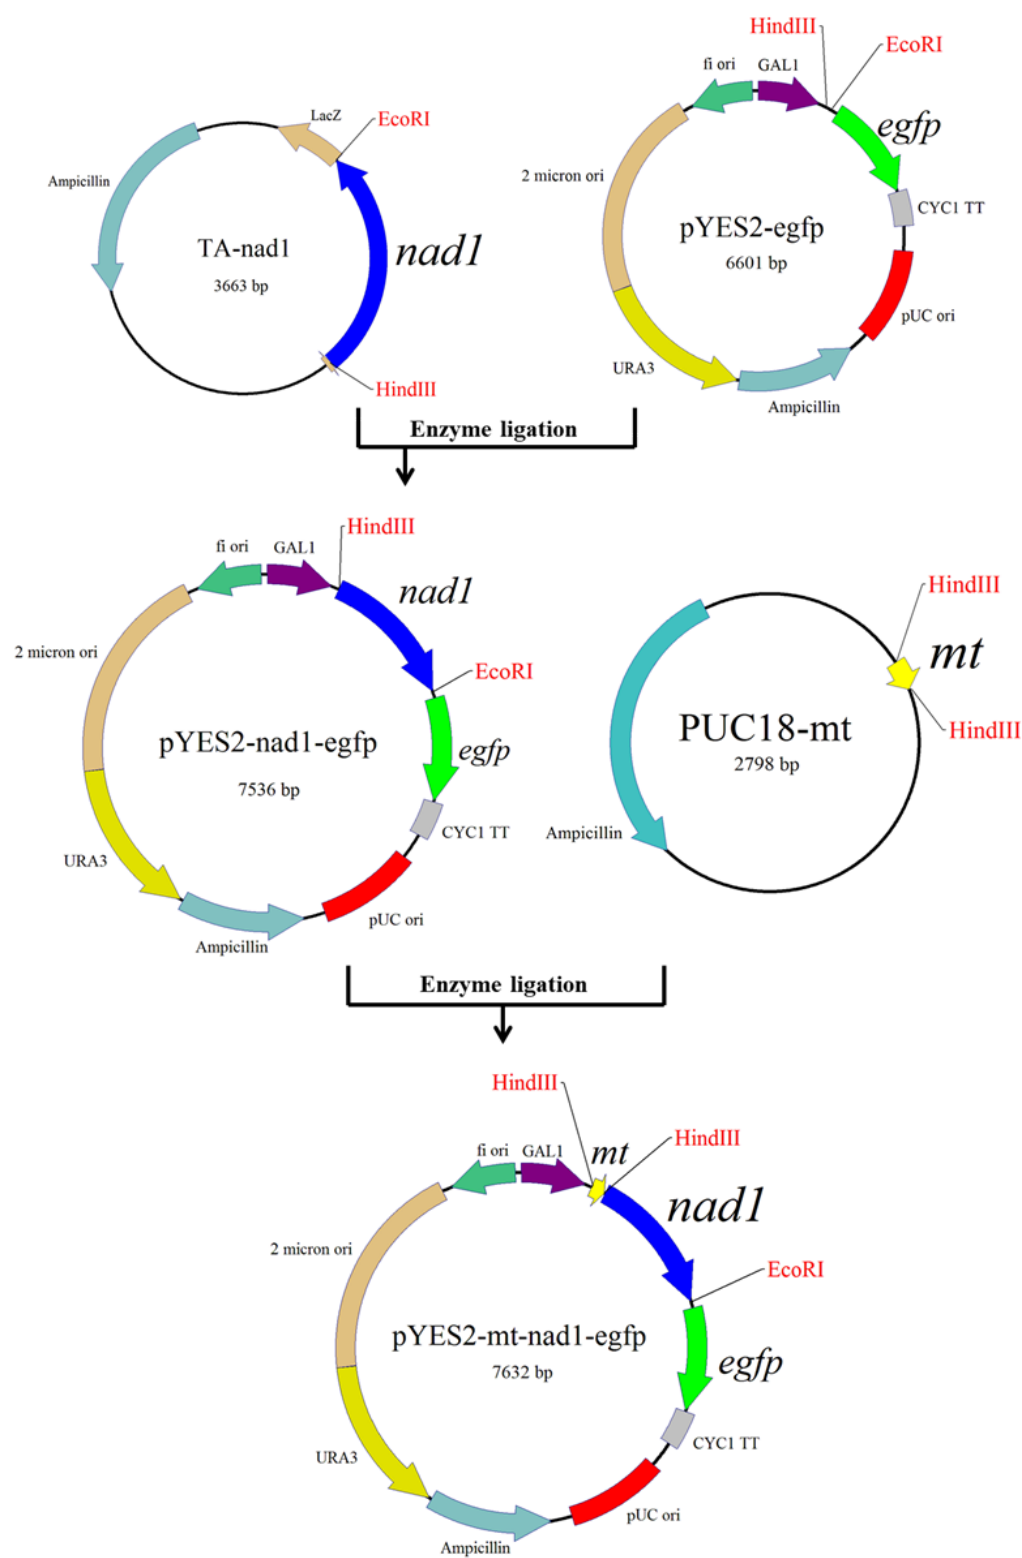

Figure S3B

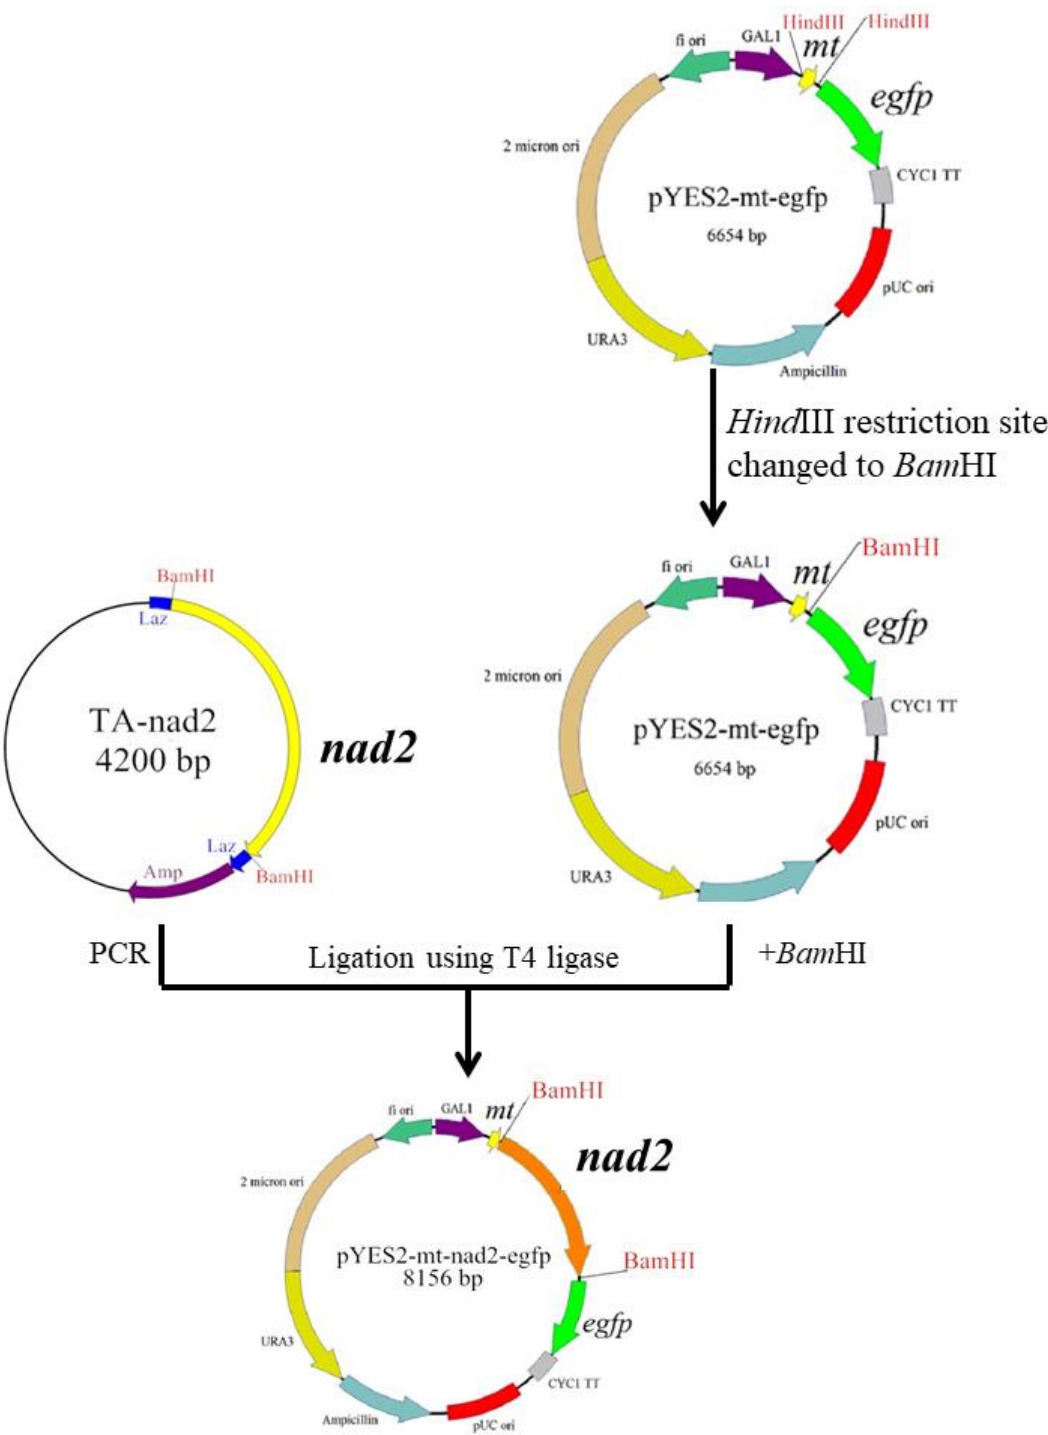

Figure S3C

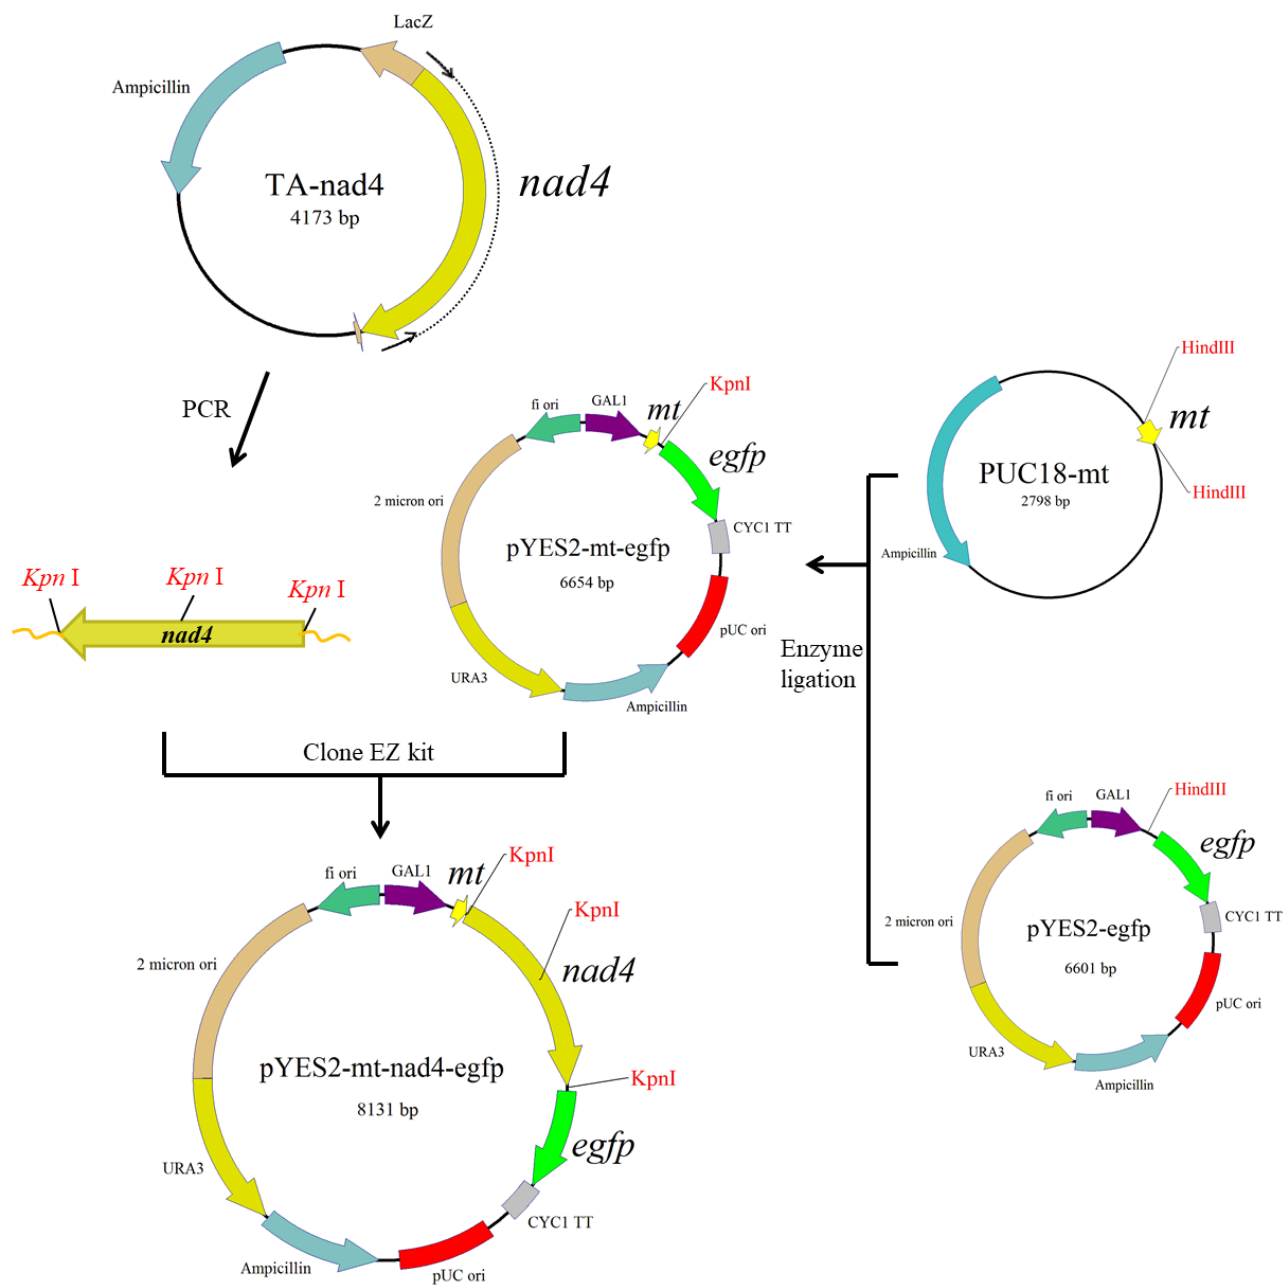

Figure S3D

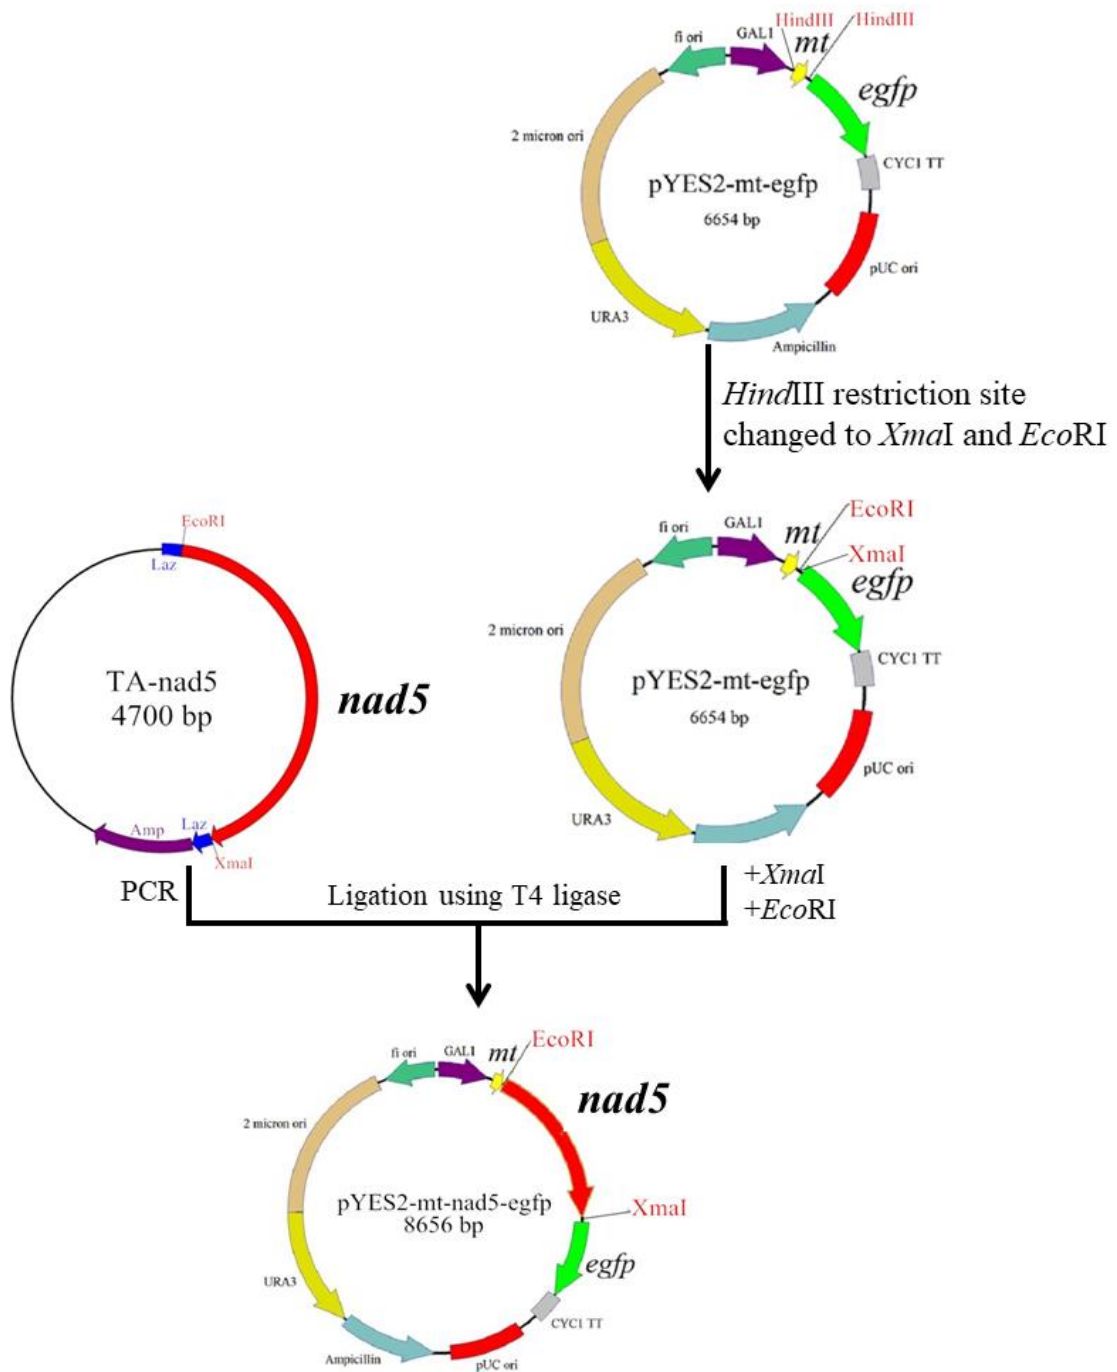

**Figure S3 Schematic diagram of construction of pYES2-mt-nad1-egfp, pYES2-mt-nad2-egfp, pYES2-mt-nad4-egfp, and pYES2-mt-nad5-egfp plasmid. (A) The *nad1* fragment from TA-nad1 was ligated into pYES2-egfp to generate pYES2-nad1-egfp. The *mt* was ligated into pYES2-nad1-egfp**

to generate pYES2-mt-nad1-egfp. (B) The *nad2* fragment from TA-nad2 was amplified by a pair of primers of BamHI-nad2-F and BamHI-nad2-R. The *nad2* fragment was ligated into pYES2-mt-egfp to generate pYES2-mt-nad2-egfp by using T4 ligase. (C) The *nad4* fragment from TA-nad4 was amplified by a pair of primers of nad4F-EZ and nad4R-EZ. The *nad4* fragment was ligated into pYES2-mt-egfp to generate pYES2-mt-nad4-egfp by using Clone EZ kit (GenScript). (D) The *nad5* fragment from TA-nad5 was amplified by a pair of primers of EcoRI-nad5-F and XmaI-nad5-R. The *nad5* fragment was ligated into pYES2-mt-egfp to generate pYES2-mt-nad5-egfp by using T4 ligase.

*LacZ* :  $\beta$ -galactosidase gene; *mt* : mitochondrial targeting sequence; *egfp* : enhance green fluorescence protein; *GAL1* : yeast *GAL1* promoter; *CYC1 TT* : transcription terminator; pUC ori : E. coli replication origin bases; Ampicillin : ampicillin resistance gene; *URA3* : orotidine 5-phosphate decarboxylase; 2 micron ori : maintenance and high copy replication in yeast; fi ori : F1 phage origin.

**Figure S4**

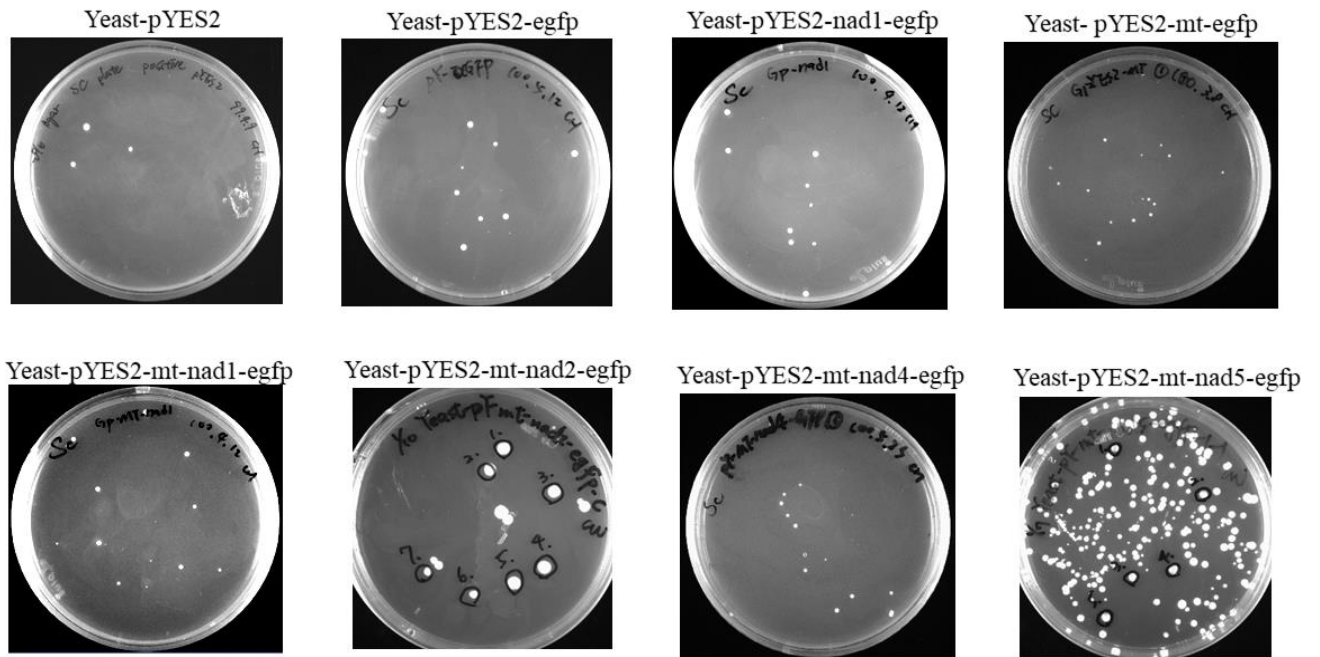

**Figure S4 Selection of yeast transformants on SC-U medium plus 2% glucose plates.** The transformants of Yeast-pYES2, Yeast-pYES2-egfp, Yeast-pYES2-nad1-egfp, Yeast-pYES2-mt-egfp, Yeast-pYES2-mt-nad1-egfp, Yeast-pYES2-mt-nad2-egfp, Yeast-pYES2-mt-nad4-egfp, pYES2-mt-nad5-egfp were spread on SC-U plate plus 2% glucose and cultured at 30°C. After 2 days, the presumptive transformants appeared as white colonies.

**Figure S5**

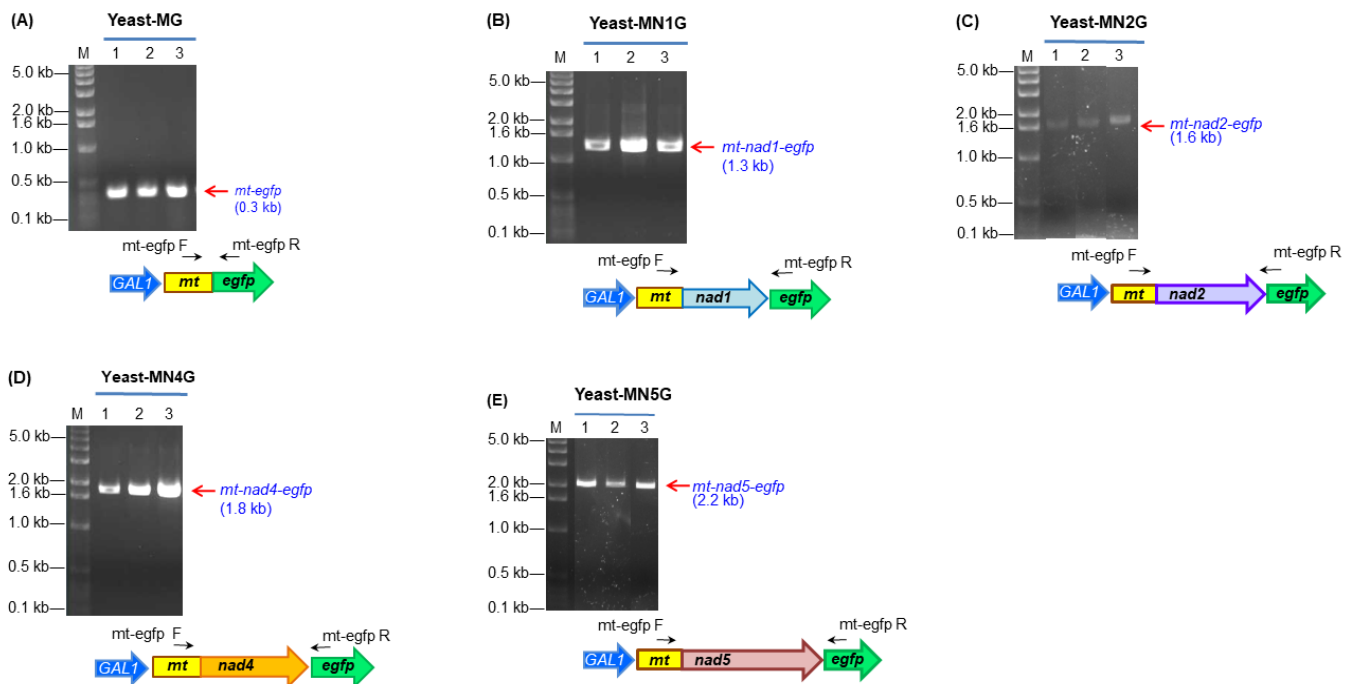

**Figure S5 Detection of fusion genes in yeast transformants by colony PCR with a pair of primers *mt-efgp-F* and *mt-efgp-R*.** (A) The 0.3 kb of *mt-efgp* fragments, (B) the 1.3 kb of *mt-nad1-efgp*, (C) the 1.6 kb of *mt-nad2-efgp*, (D) the 1.8 kb of *mt-nad4-dgfp*, and (E) the 2.2 kb of *mt-nad5-efgp* gene fragments were observed in the yeast transformants. M: 0.1 mg 1kb DNA ladders.

**Figure S6**

**A** Yeast cells (+ coomassie)

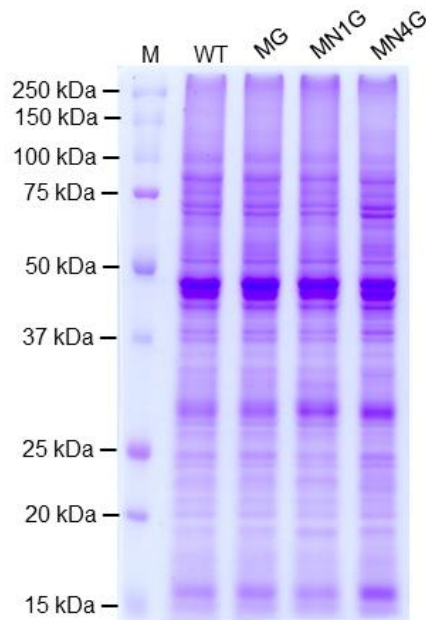

**B** Yeast cells (+ anti-GFP)

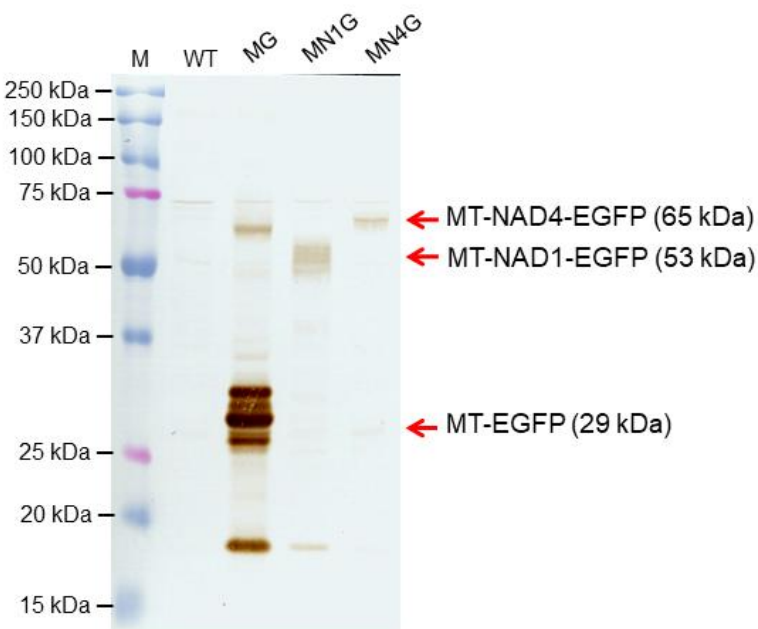

MT-NAD4-EGFP (3+37+26): 65 kDa  
MT-NAD1-EGFP (3+24+26): 53 kDa  
MT-EGFP (3+ 0 +26): 29 kDa

**C** Yeast mitochondria (+ coomassie)

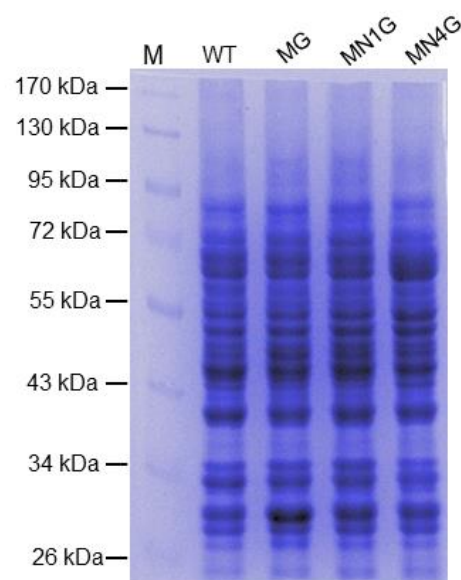

**D** Yeast mitochondria (+ anti-GFP)

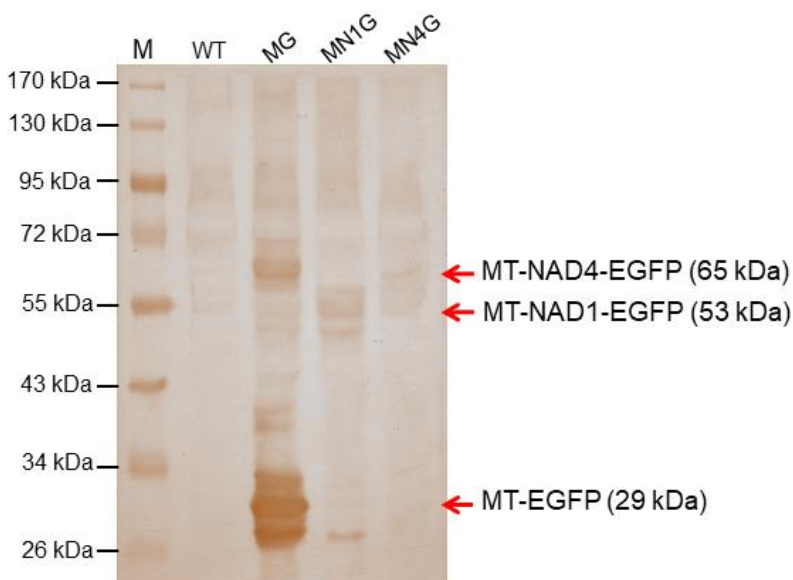

MT-NAD4-EGFP (3+37+26): 65 kDa  
MT-NAD1-EGFP (3+24+26): 53 kDa  
MT-EGFP (3+ 0 +26): 29 kDa

**Figure S6 Detection of the expressed MT-EGFP, MT-NAD1-EGFP, and MT-NAD4-EGFP in yeast transformants with anti-GFP.** (A) SDS-PAGE analysis of yeast total membrane proteins. Total membrane proteins of 25 µg from the transformants were separated on a 12% SDS-PAGE and stained with coomassie blue. (B) Extracted total membrane proteins were separated by SDS-PAGE, transferred to a PVDF membrane, and probed with anti-GFP (1:2000). The detected signals of MT-EGFP was 29 kDa, MT-NAD1-EGFP was 53 kDa, and MT-NAD4-EGFP was 65 kDa. (C) SDS-PAGE analysis of yeast mitochondrial membrane proteins. Mitochondrial membrane proteins of 25 µg from the transformants were separated on a 12% SDS-PAGE and stained with coomassie blue. (D) Extracted mitochondrial membrane proteins were separated by SDS-PAGE, transferred to a PVDF membrane, and probed with anti-GFP (1:2000). The detected signals of MT-EGFP was 29 kDa, MT-NAD1-EGFP was 53 kDa, and MT-NAD4-EGFP was 65 kDa. WT: wild type; MG: pYES2-mt-egfp transformant; MN1G: pYES2-mt-nad1-egfp transformant; MN4G: pYES2-mt-nad4-egfp transformant; M: prestained protein ladder (15-175 kDa or 26-170 kDa).

**Figure S7**

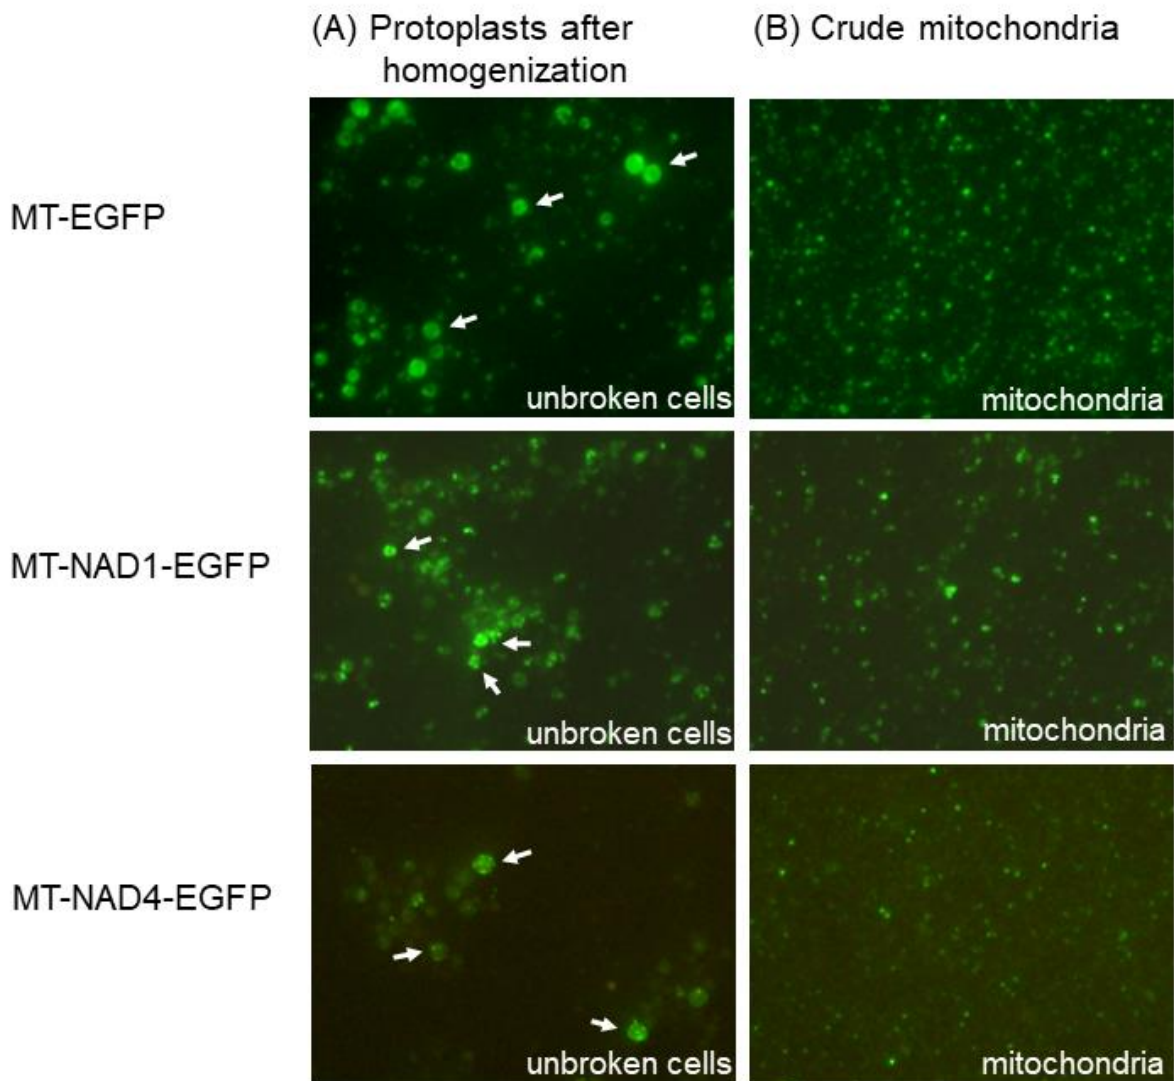

**Figure S7 Observation of the yeast mitochondria containing EGFP under fluorescence**

**microscopy.** The yeast cells were broken by digestion with lyticase and by homogenization. They were observed under fluorescence microscope. (A) After homogenization, the unbroken yeast protoplasts (white arrows) and crude yeast mitochondria were recognized under fluorescence microscope (B) The crude yeast mitochondria were observed as green spots, after the cell debris and unbroken cells were removed.

**Figure S8**

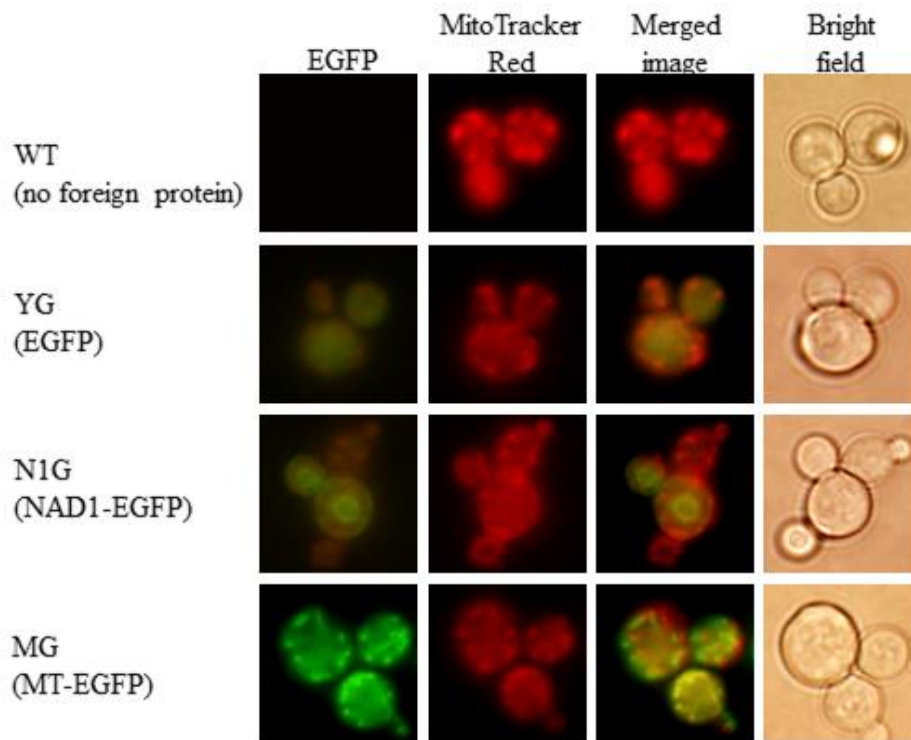

**Figure S8. Subcellular localization of EGFP, Nad1, and Nad1-EGFP fusion proteins after expression in yeast observed with fluorescence microscopy.** Yeast cells were incubated in SC-U medium plus 2% galactose for 15 h at 30°C to generate EGFP signal. Green fluorescence indicates the mitochondria containing EGFP, red fluorescence indicates the mitochondria labeled with MitoTracker Red, and the yellow regions in the merged images indicate the co-occurrence in the mitochondria. The integrity of the cells was monitored by brightfield microscopy. WT: wild type; YG: yeast-pYES2-EGFP transformant; N1G: yeast-pYES2-Nad1-EGFP transformant; MG: yeast-pYES2-mt-egfp transformant.

**Figure S9**

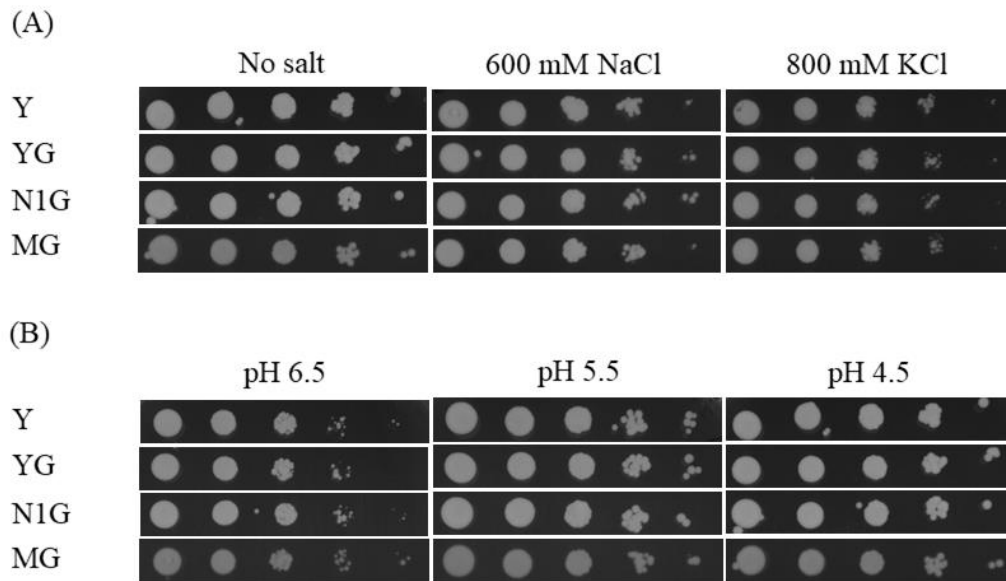

**Figure S9.  $K^+$ ,  $Na^+$ , or  $H^+$  dependent growth phenotypes of yeast WT and transformants**

**containing EGFP, NAD1-EGFP, and MT-EGFP.** (A) Yeast cell cultures, grown to saturation for 24 h in SC-U medium plus 2 % glucose, were pipetted as a 1:10 dilution series onto SC-U plus 2 % galactose agar plates, with addition of no salt, 600 mM NaCl or 800 mM KCl. (B) Yeast cell cultures were treated as above but at pH 6.5, pH 5.5, or pH 4.5. Cell growth phenotypes were photographed after 3 days. Y: no foreign protein; YG: EGFP; N1G: NAD1-EGFP; MG: MT-EGFP.
